1 Actionable absolute risk prediction of atherosclerotic  
2 cardiovascular disease: a behavior-management approach  
3 based on data from 464,547 UK Biobank participants

4

5 Ajay Kesar<sup>1\*</sup>, Adel Baluch<sup>1</sup>, Omer Barber<sup>1</sup>, Henry Hoffmann<sup>1</sup>, Milan Jovanovic<sup>1</sup>, Daniel Renz<sup>1</sup>,  
6 Bernard Leon Stopak<sup>1</sup>, Paul Wicks<sup>1</sup>, Stephen Gilbert<sup>1,2</sup>

7

8 <sup>1</sup> Ada Health GmbH, Berlin, Germany

9 <sup>2</sup> EKfZ for Digital Health, University Hospital Carl Gustav Carus Dresden, Technische  
10 Universität Dresden, Dresden, Germany

11

12 \* Corresponding author

13 E-mail: [science@ada.com](mailto:science@ada.com)

14

15

16

17

18

19

20

21

22

23

## 24 **Abstract**

25           Cardiovascular diseases (CVDs) are the primary cause of all global death. Timely and  
26 accurate identification of people at risk of developing an atherosclerotic CVD and its sequelae,  
27 via risk prediction model, is a central pillar of preventive cardiology. However, currently available  
28 models only consider a limited set of risk factors and outcomes, do not focus on providing  
29 actionable advice to individuals based on their holistic medical state and lifestyle, are often not  
30 interpretable, were built with small cohort sizes or are based on lifestyle data from the 1960s,  
31 e.g. the Framingham model. The risk of developing atherosclerotic CVDs is heavily lifestyle  
32 dependent, potentially making a high percentage of occurrences preventable. Providing  
33 actionable and accurate risk prediction tools to the public could assist in atherosclerotic CVD  
34 prevention. We developed a benchmarking pipeline to find the best set of data preprocessing  
35 and algorithms to predict absolute 10-year atherosclerotic CVD risk. Based on the data of  
36 464,547 UK Biobank participants without atherosclerotic CVD at baseline, we used a  
37 comprehensive set of 203 consolidated risk factors associated with atherosclerosis and its  
38 sequelae (e.g. heart failure).

39 Our two best performing absolute atherosclerotic risk prediction models provided higher  
40 performance than Framingham and QRisk3. Using a subset of 25 risk factors identified with  
41 feature selection, our reduced model achieves similar performance while being less complex.  
42 Further, it is interpretable, actionable and highly generalizable. The model could be incorporated  
43 into clinical practice and could allow continuous personalized predictions with automated  
44 intervention suggestions.

45

46

47

48

## 49 **Introduction**

50 Cardiovascular diseases (CVDs) are the number one cause of all global death (1,2). In 2016,  
51 17.9 million people died of CVDs alone, accounting for 31% of all global deaths (1). The direct  
52 costs of CVDs in the US for 2010 were \$272.5 billion whereas indirect costs were \$171.7 billion  
53 and are expected to increase to \$818.1 and \$275.8 billion in 2030 respectively (3,4).

54 Atherosclerosis alone is responsible for 1.3% of all hospital stays with costs of \$9 billion per  
55 year, while all atherosclerosis-related diseases amount to \$43.5 billion of total hospital costs  
56 annually (5). Individually, patients with CVD incur more than twice the medical costs of age- and  
57 sex-matched patients without CVD, largely because of the increased likelihood of subsequent  
58 hospitalizations. The greatest differences in total CVD costs usually occur when comparing  
59 patients with and without a secondary CVD hospitalization (6).

60 All current guidelines on the prevention of CVD in clinical practice recommend the assessment  
61 of total CVD risk since atherosclerosis is usually the product of a number of risk factors (7,8)  
62 and in recent years these guidelines have evolved to focus on the absolute risk of disease as  
63 opposed to relative risk (7–10). Clinician tools for CVD risk estimation must enable rapid and  
64 accurate estimation of an individual patient's absolute CVD risk (7), or for opportunistic  
65 screening of high-risk patients from relevant populations (11). Screening is the identification of  
66 unrecognized disease or risk of disease in individuals without symptoms. In addition to  
67 opportunistic screening, which is carried out without a predefined strategy (e.g. when the  
68 individual is consulting a general practitioner (GP) for some other reason), tools can be used for  
69 systematic screening, which is centrally organised strategic screening in the general population  
70 or in targeted subpopulations, such as subjects with a family history of premature CVD or  
71 familial hyperlipidaemia (7). There is ongoing debate on the role of systematic centralised  
72 population based screening in CVD (10,12), one reason for this being the tendency for  
73 increased use of burdensome diagnostic testing following the use of risk based screening

74 tools(10)(13). A relatively new area of screening is self-screening, carried out by proactive  
75 individuals, using smartphone or smartwatch app based screening tools, which may use built in  
76 app-linked sensors, or screening chat-bots (14–16). There is public demand for reliable,  
77 actionable, explainable and usable health information tools (17), including for disease  
78 screening.

79  
80 The risk to build up atherosclerotic plaque varies and is determined by multiple factors such as  
81 genetics, environment and lifestyle (11,18–21). With genetics being unmodifiable and the  
82 environment being difficult to change, the risk of developing atherosclerotic plaque can be  
83 reduced based on an individual's lifestyle which is modifiable (19,20).

84 Thus, atherosclerotic CVD is actionable and preventable by addressing behavioral risk factors,  
85 such as smoking, physical activity and nutrition (1,11,19,20).

86  
87 Most diseases, including atherosclerotic CVDs, have a complex pathophysiology that involves  
88 multiple interacting molecular systems, making it insufficient to look only at an isolated biological  
89 pathway or a subset of markers to predict disease risk (22). A precision medicine based  
90 approach is required, where multiple biological layers are considered (i.e., 'multi-omics'),  
91 alongside clinical and lifestyle data (22). Such an approach has the potential to capture all  
92 important interactions or correlations detected between molecules in different biological layers,  
93 providing a holistic understanding of an individual's current health status and enabling the  
94 quantification of an individual's absolute risk of atherosclerotic CVDs (23,24).

95  
96 Previous studies in this area use an outdated or very limited set of risk factors and outcomes for  
97 their analysis (7,25). In recent years, the knowledge of behavioral risk factors and of the  
98 pathophysiology of atherosclerotic CVDs have advanced tremendously (11,25). Current  
99 absolute risk prediction models have limited predictive capability as they have not been trained

100 on all possible atherosclerotic CVD outcomes (26–28), or they include outcomes which are  
101 unmodifiable such as those related to pregnancy, accidents, or congenital factors (28).  
102 Both SCORE (Systematic COronary Risk Evaluation) and SCORE2 (29,30), are models for  
103 predicting relative CVD risk, whereas we focus on predicting absolute CVD risk, which is why  
104 we chose to omit those models from our analysis. Another related investigation, which also used  
105 the UK Biobank (UKB) dataset, developed multiple Cox Proportional Hazard models for 10-year  
106 CVD risk prediction, with a reduced version requiring 47 risk factors and another version  
107 disregarding all cholesterol risk factors as well as systolic blood pressure, in order to provide a  
108 simple approach for risk prediction in remote settings with limited testing resources (31).  
109 However, survival models such as the proportional hazard model, are not designed to provide  
110 absolute risk estimates for individual patients.

111  
112 Machine learning (ML) based approaches have many advantages, such as superior  
113 performance, being able to identify complex non-linear patterns, the ability to encode diverse  
114 and high dimensional data types, being more stable to outliers, allowing continuous model  
115 updates, versatility for different domains and scalability (32–35).  
116 However, classic disadvantages of ML based approaches are their lack of interpretability, risk  
117 for inherent bias due to the used data, difficulty to acquire physician adoption, explaining to  
118 physicians why a new risk model might be superior to existing ones, with all of these hindering  
119 widespread adoption of ML based risk prediction models (35,36). One example for ML based  
120 CVD risk prediction is the AutoPrognosis based approach, where an ensemble of multiple ML  
121 pipelines has also been applied on the UK Biobank dataset for 5-year CVD risk prediction (28).  
122 Further, using a purely ML driven approach can lead to a model that requires too many risk  
123 factors to compute risk, which is infeasible for routine clinical check-ups. Another disadvantage  
124 of purely data-driven approaches is the inclusion of risk factors which might show strong

125 correlations but are unrelated to the pathophysiology of CVDs or are not actionable, making  
126 them inapplicable in a clinical setting or as an actionable self-management tool (28).

127  
128 The aim of this study was to use a large-data ML approach to develop an actionable absolute  
129 risk prediction tool which takes into account the holistic health of an individual and has a focus  
130 on behavioral risk factors relating to atherosclerotic CVD outcomes. Our goal was to have a  
131 highly holistic understanding of an individual's current health status, to better quantify their risk  
132 of atherosclerotic CVDs and to provide actionable advice. We aimed to do this by taking multiple  
133 biological layers into account, which are: (i) multi-omics data from blood samples (e.g. lipidome  
134 and proteome); (ii) family history (e.g. genome), (iii) lifestyle data, (iv) clinical data and (v)  
135 environmental data; along with (vi) an extensive set of risk factors and outcomes.

136  
137 We used data from 464,547 participants of the UK Biobank study who did not have  
138 atherosclerotic CVD at baseline. We created an automated pipeline to benchmark risk  
139 prediction classifier algorithms against each other, then evaluated their predictive performances  
140 in the overall population and tested the generalizability of the top-performing classifiers through  
141 retraining and testing on different sub-populations. We explored the clinical implications of the  
142 proposed classifiers, with a focus on the top-performing models. This study does not focus on  
143 the algorithmic aspects of the utilized classifiers.

144 Methodological details on the utilized classifiers can be found in the open-source documentation  
145 of the respective algorithms of the scikit-learn (37) and xgboost (38) libraries and in the  
146 supporting information (S4 Table).

147

## 148 **Materials and Methods**

### 149 **Study design and participants**

150 The UK Biobank is a long-term prospective large-scale biomedical database including over  
151 500,000 participants aged 40-69 years (when recruited between 2006 and 2010). The database  
152 is globally accessible to approved researchers undertaking research into the most common and  
153 life-threatening diseases and continuously collects phenotypic and genotypic data about its  
154 participants, including data from questionnaires, physical measures, blood, urine and saliva  
155 samples, lifestyle data (39). This data is further linked to each participant's health-related  
156 records, accelerometry, multimodal imaging, genome-wide genotyping and longitudinal follow-  
157 up data for a wide range of health-related outcomes (39,40). The UK Biobank study protocol is  
158 available online (41).

159 The North West Multi-centre Research Ethics Committee approved the UK Biobank study and  
160 all participants provided written informed consent prior to study enrollment. Our research is  
161 covered by the UK Biobank's Generic Research Tissue Bank (RTB) Approval and was  
162 approved by the UK Biobank Access Management Team (42).

163

164 We excluded participants with atherosclerotic CVDs present before or during baseline,  
165 participants who chose to leave the UKB study and participants who were lost due to various  
166 reasons. The resulting cohort consisted of 464,547 participants. The last available date of  
167 participant follow-up was March 5th, 2020.

168

### 169 **Risk factor definition**

170 We curated a list of all generally known risk factors and outcomes for atherosclerotic CVDs from  
171 the medical literature and from validated risk prediction models. This preliminary list of risk  
172 factors was reduced through curation to focus on those factors that were clearly involved in the  
173 pathophysiology of atherosclerosis and those that are modifiable through behavioral change.

174 The curation was carried out by three medical doctors with experience in diagnosing or  
175 scientifically modelling cardiovascular diseases. We consolidated all relevant UKB columns into

176 203 risk factors and grouped them into six categories: demographics (e.g. age, biological sex,  
177 ethnicity), biomarkers (e.g. cholesterol, glucose, blood pressure, heart rate), lifestyle (e.g.  
178 alcohol consumption, smoking, physical activity, sleep, social visits), environment (e.g. exposure  
179 to tobacco smoke, work and housing and other socio-economic related factors), genetics (e.g.  
180 family history of cvd, stroke, diabetes, high cholesterol, high blood pressure) and comorbidities  
181 (e.g. heart arrhythmias, diabetes, acute & chronic kidney injury, migraines, rheumatoid arthritis,  
182 systemic lupus erythematosus, severe mental illnesses (schizophrenia, bipolar disorder,  
183 depression, psychosis), diagnosis or treatment of erectile dysfunction, atypical antipsychotic  
184 medication). A categorized list of all risk factors used in our analysis is provided in the  
185 supplementary data (S1 Table).

186

### 187 **Outcome definition**

188 In the same manner as described above, an initial list of atherosclerotic CVDs was further  
189 reviewed and curated by the same team of medical doctors. All resulting CVDs of interest are  
190 associated with atherosclerotic plaque build-up, are modifiable and relate to the collected risk  
191 factors only. Thus, we disregard brain haemorrhages due to accidents and congenital and  
192 pregnancy-related CVDs, which are not actionable. The curated list of all ICD-10 and ICD-9  
193 outcomes meeting the above criteria consists of 193 total (125 unique) CVD outcomes, e.g.  
194 coronary/ischaemic heart disease, heart attack, angina, stroke, cardiac arrest, congestive heart  
195 failure, left ventricular failure, myocardial infarction, aortic valve stenosis, cerebral artery  
196 occlusions, nontraumatic haemorrhages. A list with all outcome codes used in our analysis is  
197 provided in the supplementary data (S2 Table). An atherosclerotic CVD event was defined as  
198 the first occurrence out of the following: any of the atherosclerotic CVD outcome diagnosis  
199 codes, also as primary or secondary death cause during the 10-year follow-up period.

200



201 **Cohort Follow-up**

202 Follow-up time was set to 10 years as commonly used in other risk models (see table 2 in (7))  
203 and counted from the date of one's initial assessment center visit. Individuals who died from  
204 other causes during their follow-up period or had a relevant CVD event past their individual  
205 follow-up period, were marked as not having had a relevant CVD event.

206

207 **Models used in comparison**

208 **Framingham Risk Score.** The Framingham 10-year CVD absolute risk score is based on the  
209 data of the two prospective studies, the Framingham Heart Study and the Framingham offspring  
210 study (26). The cohort consists of 8491 participants, with 4522 women and 3969 men who  
211 attended a baseline examination between 30 and 74 years of age and were free of CVD. A  
212 positive CVD outcome was defined as any of the following: coronary death, myocardial  
213 infarction, coronary insufficiency, angina, ischemic stroke, hemorrhagic stroke, transient  
214 ischemic attack, peripheral artery disease and heart failure.

215 Participants were followed-up for 12 years where 1174 participants developed a CVD. Two  
216 biological sex-specific risk models were derived, where Body Mass Index (BMI) substitutes lipid  
217 measurements. The variables used were biological sex, age, total cholesterol, HDL cholesterol,  
218 treated and untreated systolic blood pressure, smoking status and diabetes status.

219 The Framingham risk calculators and model coefficients are publicly available (43). We imputed  
220 missing data using simple mean imputation.

221

222 **QRisk3.** The QRisk3 10-year CVD absolute risk score is based on a prospective open cohort  
223 study using data from general practices (GPs), mortality and hospital records in England (27).  
224 The cohort consists of 10.56 million patients between the age of 25 and 84 years, where 75% of  
225 the patients were used for training and 25% for validation. Patients with a pre-existing CVD,

226 missing Townsend score or using statins were removed from the baseline. Patients were  
227 classified as having a positive CVD outcome when any of the following outcomes was present  
228 during follow-up in the GP, hospital or mortality records: coronary heart disease, ischaemic  
229 stroke, or transient ischaemic attack. QRisk3 used the following ICD-10 codes: G45 (transient  
230 ischaemic attack and related syndromes), I20 (angina pectoris), I21 (acute myocardial  
231 infarction), I22 (subsequent myocardial infarction), I23 (complications after myocardial  
232 infarction), I24 (other acute ischaemic heart disease), I25 (chronic ischaemic heart disease), I63  
233 (cerebral infarction), and I64 (stroke not specified as haemorrhage or infarction). The utilized  
234 ICD-9 codes were: 410, 411, 412, 413, 414, 434, and 436. Participants were followed-up for 15  
235 years where 363,565 participants of the training set (4,6%) developed a relevant CVD. One  
236 biological sex-specific risk model was derived.

237 The risk factors used in the final model were age, ethnicity, deprivation, systolic blood pressure,  
238 BMI, total cholesterol/HDL cholesterol ratio, smoking status, family history of coronary heart  
239 disease, diabetes status, treated hypertension, rheumatoid arthritis, atrial fibrillation, chronic  
240 kidney disease, systolic blood pressure variability, diagnosis of migraine, corticosteroid use,  
241 systemic lupus erythematosus, atypical antipsychotic use, diagnosis of severe mental illnesses,  
242 diagnosis or treatment of erectile dysfunction.

243 The QRisk3 risk calculator and model coefficients are publicly available (44), built into all major  
244 NHS GP systems and included in the national guidelines  
245 (<https://www.healthcheck.nhs.uk/seecmsfile/?id=1687>, accessed 10th November 2021). We  
246 imputed missing data using simple mean imputation.

247

248 **Standard linear and ML models.** We compared regularized linear regression (with L1 penalty),  
249 random forests and gradient boosting (xgboost implementation) for assessing the highest  
250 achievable Area Under the Receiver Operating Characteristic Curve (AUROC) value, which we  
251 used for assessing the trade-off between number of features and predictive performance of

252 several simpler *practical risk predictors*, as determined by an iterative feature elimination  
253 procedure outlined below. L1 regularization for logistic regression implements a strong penalty  
254 for non-zero feature weights, resulting in a feature selection procedure that discards features  
255 that are likely to be non-predictive. Random Forest is an ensemble method that fits many  
256 decision trees independently to a subset of the data. We implemented both methods using their  
257 scikit-learn library implementation. Finally, we evaluated Extreme Gradient Boosting: Gradient  
258 boosting is an ensemble tree-based machine learning method that combines many weak  
259 classifiers to produce a stronger one. It sequentially fits a series of classification or regression  
260 trees, with each tree created to predict the outcomes misclassified by the previous tree (45). By  
261 sequentially predicting residuals of previous trees, the gradient boosting process has a focus on  
262 predicting more difficult cases and correcting its own shortcomings. Extreme Gradient Boosting  
263 (XGB / XGBoost) is a specific implementation of the gradient boosting process, and uses  
264 memory-efficient algorithms to improve computational speed and model performance (38,46).  
265 For completeness, we evaluated a number of other standard classifiers, but discarded them due  
266 to too high computational complexity or inferior performance so we do not report their  
267 performances here: Decision Trees, Voting Classifiers, Multi-Layer Perceptrons with 2 layers  
268 and 200 and 150 neurons each (Neural Network), stochastic gradient descent implementing a  
269 support vector machine algorithm (47,48), Ada Boost (49,50), Gradient Boosting (45), K  
270 Neighbors (51), Quadratic Discriminant Analysis (52) and Gaussian Naive Bayes (37,53).

271

## 272 **Model development and benchmarking using pipeline**

273 We built a benchmarking pipeline for automated and reproducible data extraction, normalization,  
274 imputation, model training, tuning of model hyperparameters, classification, documentation and  
275 reporting.

276 We implemented all models using their respective scikit-learn library or xgboost library  
277 implementation using the Python programming language (37,38). Details on the used Python  
278 libraries and methods are provided in the supplementary data (S3 and S4 Tables).  
279 Categorical values were one-hot encoded. Data normalization was performed by removing the  
280 mean and scaling to unit variance. Data imputation was performed for all models using a simple  
281 mean imputation. The models' hyper-parameters were determined using grid search and  
282 stratified k-fold cross validation using 3 folds to avoid overfitting.  
283 Finally, we assessed model performance mainly using the AUROC.

284

### 285 **Iterative feature elimination**

286 We employed an iterative feature elimination procedure based on the regularized logistic  
287 regression for finding the best trade-off between predictive performance and number of risk  
288 factors, with the aim of creating a risk prediction algorithm that is applicable in the clinical  
289 context. We used the standard L1 regularization (also known as Lasso) proposed by (54); it  
290 implements a strong penalty on non-zero feature weights of our logistic regression model,  
291 resulting in a sparse feature set for prediction.

292 A logistic regression coefficient value  $\beta$  can be interpreted as the expected change in log odds  
293 of having the outcome per unit change in the feature  $x_j$ . Therefore, increasing the feature by  
294 one unit multiplies the odds of having the outcome by  $e^\beta$ . This means that we can interpret the  
295 coefficients as feature importance values in the sense that the feature with the smallest  
296 coefficient has the least importance on model predictions. Importantly, this holds only true in the  
297 context of the parameters contained in the current model. Thus, we re-estimate the model after  
298 each feature elimination round.

299 In each iteration, we re-estimated the logistic regression model on the remaining parameters,  
300 and then discarded all parameters that were set to zero by the L1 regularization; finally, we also

301 discarded the parameter with the lowest non-zero absolute value.

302 As an additional step, we created a ranking of the relative feature importance value of each  
303 feature by dividing its absolute coefficient weight by the sum of all absolute coefficient weights.

304

### 305 **Statistical analysis**

306 To reduce overfitting, we evaluated the classification performance of all our benchmarked  
307 algorithms by using 3-fold stratified cross-validation and measuring the Area Under the Receiver  
308 Operating Characteristic Curve. For the cross-validation, we used a training set with 325,182  
309 participants to train and derive our standard linear and ML models and then assessed the  
310 AUROC performance on the held-out test set with 139,365 participants using 203 risk factors  
311 respectively. We report the AUROC and the 95% confidence intervals (Wilson score intervals)  
312 for all models.

313

### 314 **Generalizability**

315 With 442,620 out of the 502,551 patients in the UK Biobank, the cohort has a high proportion  
316 (88.1%) of participants with British ethnicity. In an effort to estimate a proxy for out-of-sample  
317 generalizability, we re-trained the two best models, XGB and Logistic Regression with L1  
318 regularization, only on whites and tested their performance on a non-white test set. The white-  
319 only training set consists of 378,836 participants (81.5%). The non-white test set consists of  
320 85,711 participants (18.5%).

321

## 322 **Results**

### 323 **Characteristics of the training and test populations**

324 Of 502,551 patients in the UK Biobank, we filtered out 7.6% who already experienced a relevant  
325 CVD outcome (during or before baseline) and the participants being lost or who withdrew from

326 the biobank. This resulted in 464,547 participants who met the inclusion criteria. 28,561 (6.1%)  
 327 of those participants developed at least one of the relevant CVD outcomes during their 10-year  
 328 follow-up period. We used a common 70% of the data as a training set and 30% as a hold-out  
 329 test set. Table 1 shows the overlap of our atherosclerotic CVD outcome definition with the CVD  
 330 outcome definition used in the related work approach by Alaa et al. (28):

331

332 **Table 1. CVD outcomes statistics according to definition in current study and the**  
 333 **comparator study definition by Alaa et al. (28).**

| Statistic measured                                                                                               | Number                       |
|------------------------------------------------------------------------------------------------------------------|------------------------------|
| No. of atherosclerotic CVD outcomes that developed in 10-year follow-up according to definition in current study | 28,561                       |
| No. of CVD outcomes that developed in 10-year follow-up according to comparator study definition                 | 28,242                       |
| No. of CVD outcomes after 10-year follow-up that overlap in the current study and comparator study definition    | 456,184 out of 464,547 (98%) |
| No. of CVD outcomes identified in the current study but not in comparator studies                                | 4,341                        |
| No. of CVD outcomes included in comparator studies, but not in current study                                     | 4,022                        |

334

### 335 **Prediction accuracy**

336 **Comparison of prediction models.** The resulting prediction accuracy of the benchmarked  
 337 models is depicted in Table 2. We used both Framingham 10-year CVD risk versions, with and  
 338 without lipids, as well as QRisk3 as baseline models to assess the performance of predicting

339 someone's 10-year risk of developing an atherosclerotic cardiovascular disease based on a  
 340 holistic set of risk factors, with a focus on actionable risk factors and outcomes. The best  
 341 performing model was XGB with an AUROC of 75.73%, only marginally higher than the Logistic  
 342 Regression model with L1 regularization (75.44%) and substantially better than the Random  
 343 Forest model (66.90%).

344 **Table 2. Performance of all tested classifiers including baseline models.**

| No. | Algorithm Name                             | AUROC and 95% confidence intervals                     |
|-----|--------------------------------------------|--------------------------------------------------------|
| 1   | Extreme Gradient Boosting (XGB)            | 0.7573<br>(0.755-0.7595)                               |
| 2   | Logistic Regression with L1 regularization | 0.7544<br>(0.755-0.7595)                               |
| 3   | QRisk3                                     | 0.725<br>(0.7226-0.7273)                               |
| 4   | Framingham Lipid & BMI                     | 0.680 (0.6775-0.6824)<br>&<br>0.681<br>(0.6788-0.6837) |
| 5   | Random Forest                              | 0.6690<br>(0.6666-0.6715)                              |

345  
 346 Fig 1 shows the AUROCs of the best performing models XGB and from Logistic Regression  
 347 with L1 regularization, which is the simplest model tested and amongst the top two best  
 348 performing models. Logistic Regression comes with the advantages of being interpretable by  
 349 providing reasoning for its classifications, and being a simple and robust method (35).  
 350 In order to better evaluate the clinical implications and significance of our results, we compared  
 351 the results of our benchmarked models with our baseline models Framingham and QRisk3.  
 352 Table 2 shows that both, our XGB and Logistic Regression classifiers achieved superior

353 performance compared to the baseline models. Apart from the Random Forest model, all tested  
354 models had a higher AUROC than both baseline Framingham (68.0% and 68.1%) and QRisk3  
355 (72.5%) models.

356 The difference in AUROC performance of the Framingham score in our experiments in Fig 1  
357 and the one stated from Alaa et al. (28) in their study are explainable by the related work  
358 approach using an older UK Biobank version with 40,000 fewer baseline patients and their last  
359 available date of participant follow-up being February 17, 2016. Furthermore, our UK Biobank  
360 version has biochemistry data which was released May 1, 2019 including cholesterol and  
361 additional questionnaires data which the related approach did not have. Additionally, more  
362 diagnosis data was made available over time. These dataset differences explain the difference  
363 in AUROC.

364

365 **Fig 1. AUROC of Logistic Regression with L1 regularization and XGBoost**

366

367 Figs 2 and 3 show the AUROCs of all baseline models on imputed and unimputed data  
368 respectively.

369

370 **Fig 2. AUROC curves of baseline models on imputed data**

371

372

373 **Fig 3. AUROC curves of baseline models on unimputed data**

374

375 Both Framingham versions perform nearly identically on imputed and unimputed data whereas  
376 QRisk3 performs worse on unimputed data.

377 **Feature elimination vs. predictive performance**



378 Fig 4 shows how the performance of the best Logistic Regression model depends on the  
379 number of risk factors used. Stepwise discarding the risk factors leads to a relatively unchanged  
380 and stable model performance until around 170 iterations of feature elimination. This indicates  
381 that for predicting an individual's 10-year atherosclerotic CVD risk, many features provide only  
382 marginal value and a small subset of features provides substantial informative value. After  
383 around 170 iterations, there was a marked decline in model performance associated with further  
384 reductions in utilized features.

385

386

387 **Fig 4. Performance of best Logistic Regression model depending on number of features.**

388 AUROC performance of best performing Logistic Regression model with L1 regularization  
389 (continuous blue line) compared to number of features utilized in each iterative feature  
390 elimination step (orange line), dotted blue horizontal line showing intersection of 25 features  
391 with iterative feature elimination step, allowing for extrapolation to model performance.

392

393 Table 3 shows in more detail the dependence of the model performance on the number of  
394 features. Utilizing only 25 (88%) out of the 203 total risk factors still leads to a reasonable  
395 AUROC performance, with a high reduction in utilized features. Compared to the model  
396 performance with an AUROC of 75.44% when using all 203 risk factors, the model still achieves  
397 74.15% with the 25 most informative risk factors.

398 We also assessed the concrete performance for fewer features. To reach the same  
399 performance as QRisk3 of 72.5% AUROC, 16 features would be necessary. The two most  
400 informative features are age and biological sex. To reach a similar performance as Framingham  
401 (68.0%), two features would be necessary (68.98%). It is worth noting that both Framingham  
402 and QRisk3 were trained and tuned on other datasets and have different CVD definitions and  
403 objectives.

404

405 **Table 3. Performance of best Logistic Regression model depending on number of**  
406 **features.**

| <b>Number of Features</b> | <b>AUROC</b> |
|---------------------------|--------------|
| 203                       | 75.44        |
| 40                        | 75.01        |
| 25                        | 74.15        |
| 20                        | 73.32        |
| 17                        | 72.76        |
| 10                        | 70.88        |
| 2                         | 68.98        |

407

408 **Generalizability results**

409 We assessed the generalizability of our models with the aforementioned approach of re-training  
410 the two previously best performing models only on a white cohort and testing them on a non-  
411 white cohort. Table 4 and Fig 5 show the results for Logistic Regression and XGB. The Logistic  
412 Regression model has an AUROC of 75.86% in the generalizability experiment, compared with  
413 an AUROC of 75.44% in the previous experiment. XGB has an AUROC of 76.26% in the  
414 generalizability experiment and 75.73% in the previous experiment. These results show  
415 marginal differences to the results of the previous experiments.

416

417 **Table 4. Model performance when trained on whites and tested on non-whites.**

| <b>Model</b>                               | <b>AUROC on generalizability experiment</b> | <b>Previous AUROC results</b> |
|--------------------------------------------|---------------------------------------------|-------------------------------|
| Logistic Regression with L1 regularization | 75.86%                                      | 75.44%                        |
| XGBoost                                    | 76.26%                                      | 75.73%                        |

418

419

420 **Fig 5. AUROC of Logistic Regression with L1 regularization and XGBoost when trained**  
 421 **on whites and tested on non-whites.**

422 **Predictive ability of individual variables in UK Biobank.**

423 Table 5 shows the relative regression feature weights of the 25 most informative risk factors in  
 424 descending order. A full list is provided in the supplementary materials (S5 Table). Based on our  
 425 previous manual curation of risk factors and outcomes, we can see that the most informative  
 426 risk factors are distributed across 5 categories (Table 6). The two most informative features  
 427 were age and biological sex.

428

429 **Table 5. Relative regression feature weights of 25 most informative risk factors from best**  
 430 **Logistic Regression model.**

| <b>Feature number</b> | <b>Risk factor name</b> | <b>Relative informative value descending</b> |
|-----------------------|-------------------------|----------------------------------------------|
|                       |                         |                                              |

|    |                                   |        |
|----|-----------------------------------|--------|
| 1  | Age                               | 0.0938 |
| 2  | Biological sex                    | 0.0485 |
| 3  | Systolic blood pressure           | 0.0284 |
| 4  | Social visits: About once a week  | 0.0277 |
| 5  | Social visits: 2-4 times a week   | 0.0273 |
| 6  | Walking pace: Brisk pace          | 0.0268 |
| 7  | Total cholesterol HDL ratio       | 0.0267 |
| 8  | Total cholesterol                 | 0.0239 |
| 9  | LDL cholesterol                   | 0.0235 |
| 10 | Familial CVD                      | 0.0218 |
| 11 | Social visits: About once a month | 0.0203 |
| 12 | Sleep problems: Not at all        | 0.0188 |
| 13 | Alcohol with meals: Yes           | 0.0184 |
| 14 | Smoking                           | 0.0184 |
| 15 | Social visits: Almost daily       | 0.0178 |
| 16 | No. of cigarettes daily           | 0.0163 |
| 17 | Hypertension                      | 0.0160 |
| 18 | Walking pace: Steady average      | 0.0154 |

|    |                                      |        |
|----|--------------------------------------|--------|
|    | pace                                 |        |
| 19 | Waist circumference                  | 0.0150 |
| 20 | Alcohol with meals: It varies        | 0.0141 |
| 21 | Social visits: Once every few months | 0.0139 |
| 22 | Overall health rating: Excellent     | 0.0134 |
| 23 | Other Heart Arrhythmias              | 0.0129 |
| 24 | Overall health rating: Poor          | 0.0123 |
| 25 | Sleep problems: Several days         | 0.0122 |

431

432 **Table 6. Categorization of the 25 most informative risk factors into categories from the**  
433 **best Logistic Regression model.**

| <b>Category</b> | <b>Risk Factors</b>                                                                                           |
|-----------------|---------------------------------------------------------------------------------------------------------------|
| Demographics    | Age, Biological sex                                                                                           |
| Biomarkers      | Waist circumference, systolic blood pressure, total cholesterol, LDL cholesterol, total cholesterol HDL ratio |
| Comorbidities   | Hypertension, sleep problems: not at all, sleep problems: several days, other heart arrhythmias               |
| Family History  | Familial CVD                                                                                                  |

|                   |                                                                                                                                                                                                                                                                                                                                                                                         |
|-------------------|-----------------------------------------------------------------------------------------------------------------------------------------------------------------------------------------------------------------------------------------------------------------------------------------------------------------------------------------------------------------------------------------|
| Lifestyle Factors | Social visits: about once/week, social visits: 2-4 times/week, social visits: about once/month, social visits: almost daily, social visits: once every few months, smoking, no. of cigarettes daily, alcohol with meals: yes, alcohol with meals: it varies, walking pace: steady average pace, walking pace: Brisk pace, overall health rating: excellent, overall health rating: poor |
|-------------------|-----------------------------------------------------------------------------------------------------------------------------------------------------------------------------------------------------------------------------------------------------------------------------------------------------------------------------------------------------------------------------------------|

434

## 435 Discussion

436 Using data gathered from the large longitudinal cohort UK Biobank study, we developed a  
437 pipeline to benchmark several classification models for predicting a subject's 10-year absolute  
438 risk of developing an atherosclerotic CVD. We used an extensive set of physician curated risk  
439 factors and outcomes methodology, employing a holistic view of the subject's current health  
440 status rooted in a precision medicine approach. The models were trained and evaluated using  
441 data from 464,547 UK Biobank participants, spanning 203 CVD risk factors for each subject.  
442 Using a simple Logistic Regression model with a holistic set of risk factors significantly improved  
443 the accuracy of atherosclerotic CVD risk prediction compared to currently available, widely used  
444 and recommended models such as Framingham and QRisk3. Both of these existing models rely  
445 on a limited set of risk factors and outcomes and do not focus on modifiable lifestyle factors.  
446 Further, our best performing Logistic Regression model utilizes new CVD risk predictors  
447 showing high predictive power, which are social visits, walking pace and overall health rating.  
448 The frequency of social visits could be indicative of someone's current mental health status,  
449 which has been shown to be a relevant CVD risk factor (55,56). These and other non-laboratory  
450 risk factors could be collected by means of a questionnaire or passively deduced using data  
451 analytics from data sources such as GPS, calendar and sensors from smartphones,

452 smartwatches and fitness trackers.

453 Additionally, our best performing models, XGBoost and Logistic Regression, showed marginal  
454 differences when trained and tested on particular sub-populations, which is indicative of good  
455 generalizability to other ethnicities.

456 As there was little performance difference between the best performing models, we primarily  
457 discuss the simplest model, Logistic Regression with L1 regularization. This model has the  
458 inherent benefit of offering reasoning for its predictions, through analyzing the learned  
459 coefficients for every risk factor and having feature selection performed by the L1 regularization.  
460 With L1 regularization, less important risk factors' coefficients are minimised and also set to  
461 zero, which then leads to entire removal of these features from the model, and fewer risk factors  
462 needed for an accurate prediction.

463

464 Using iterative feature elimination, we identified a subset of the 25 most relevant risk factors  
465 providing a similar performance compared to using all 203 risk factors. With the 25 most  
466 relevant risk factors belonging to five different categories, suggests that different biological  
467 layers contribute to the risk of atherosclerotic CVD. This result indicates that it is insufficient to  
468 assess only one biological layer for accurate risk prediction, confirming the findings of other  
469 studies for identifying novel biomarkers and pathways in complex diseases (57). This result  
470 supports our initial model development approach: to use a holistic model for an individual's  
471 health. Our approach was rooted in precision medicine and takes into account multiple  
472 biological layers by using multi-omics as well as clinical and lifestyle data with the aim to capture  
473 all potential interactions or correlations detected between molecules in different biological layers  
474 (22). Multi-omics data generated for the same set of samples can provide useful insights into  
475 the interaction of biological information at multiple layers and thus can help in understanding the  
476 mechanisms underlying the complex biological condition of interest.

477

478 In our model, the lifestyle category contributed the most risk factors, suggesting that it is  
479 essential to include someone's daily lifestyle data and not just periodic snapshots of clinical data  
480 into an individual's risk assessment for a complex disease like CVD. The causal relationships  
481 between the risk factors considered in our model and atherosclerotic CVDs have been  
482 demonstrated by other studies (11,19,21,25). Innovative approaches are needed in order to  
483 tackle the increasing prevalence and mortality of CVD-related diseases (2), and the associated  
484 healthcare systems' financial burdens. This is especially required in low and middle income  
485 countries where CVD prevalence has also been increasing and is expected to increase as a  
486 consequence of an aging and growing population (2).

487  
488 There is potential for novel disruptive approaches to affordably improve CVD outcomes. Areas  
489 where this may have an impact is in novel approaches to screening, lifestyle coaching and  
490 prevention (2). Screening will become more accessible and widespread by more (near-)medical-  
491 grade sensors being integrated into smartphones and smartwatches, enabling continuous  
492 monitoring of relevant behavioral CVD risk factors, as well as biomarkers such as heart rate,  
493 blood pressure and blood glucose. By gathering a wider spectrum of relevant risk factors for  
494 cardiovascular disease automatically and continuously, an ongoing and personalized  
495 cardiovascular disease risk prediction could be enabled. Through linking personalised  
496 information on an individual's CVD risk with app-based programmes for sustained behavioural  
497 modification, it may be possible to lower the incidence and mortality of CVDs (58). Combined  
498 with a companion smartphone-based app, an AI or healthcare provider-generated personalised  
499 intervention program could be provided, and targeted at those people who need it the most.  
500 Many studies have shown that digital health interventions are cost effective for managing CVD  
501 (for a review see (59)). One report found that a community-based prevention program could  
502 have a mean return on investment (ROI) on medical cost savings of \$5.60 for every \$1 spent  
503 within a 5 year timeframe by improving physical activity and nutrition and reducing tobacco



504 usage (60). A review of 11 in-home cardiac rehabilitation programs for the secondary prevention  
505 of CVD found that social support, goal setting, monitoring, credible instructions and literature  
506 resources are all effective behavior change techniques to reduce behavioral risk factors for CVD  
507 (61).

508

509 The improvement achieved by our models might be partially attributed to being trained and  
510 assessed on the UK Biobank dataset, whereas the baseline Framingham model was derived  
511 from a different population. The population and many of the data sources used in the QRisk3  
512 model are similar, being the general UK population and using their GP, hospital and mortality  
513 records. However, our risk model generation approach and QRisk3's approach were designed  
514 with different aims and objectives and the modelling strategy was different. For these reasons,  
515 direct comparison between the models is limited. Notable differences between the approaches  
516 include a more limited set of risk factors included in Framingham and QRisk3's and a focused  
517 and wider range of atherosclerotic CVDs included in our approach.

518

519 The results from our generalizability subanalysis indicate that our XGB and Logistic Regression  
520 models might generalize well to other ethnicities and do not overfit to our cohort, however, this  
521 needs to be further evaluated with more data from diverse ethnicities.

522

523 Our results show that our models have improved performance over the baseline models  
524 Framingham and QRisk3 (Table 2). This is because the selection of the appropriate disease  
525 modelling approach, classifiers and careful tuning of the model's hyperparameters are crucial  
526 steps for realizing the potential benefits of ML. Our pipeline automates some of these steps  
527 which makes the tuning and discovery of new disease risk models easily accessible for clinical  
528 research. Our prospective cohort modelling approach, which is rooted in precision medicine, is

529 the first to generate an atherosclerotic CVD absolute risk prediction tool based upon a complete  
530 definition of atherosclerotic CVD outcomes and a holistic set of risk factors.

531

## 532 **Limitations**

533 The UK Biobank only admitted participants for their initial signup from the ages 40 and up. This  
534 might limit the applicability of the risk score for younger populations and further tests with data  
535 from younger populations need to be conducted.

536

537 There are many missing data values related to the potential risk factors for many participants.  
538 Having more unimputed data of relevant CVD risk factors could improve the predictive  
539 performance of all our benchmarked classifiers and could also lead to changes in the classifier  
540 ranking from Table 2 and relative risk factor importances in Table 5. However, the use of  
541 imputed data is highly unlikely to have an impact on our conclusion that a holistic set of risk  
542 factors and an exhaustive atherosclerotic CVD outcome definition could improve atherosclerotic  
543 and actionable CVD risk prediction.

544

545 An additional limitation of our study is that the UK Biobank dataset consists of participants of  
546 predominantly (88%) British ethnicity, with an even larger portion having a white background  
547 (91%). Therefore, further assessments of the influence of the ethnicity predictor need to be  
548 carried out to enable a generalizable tool. Previous work in this area indicates that the plaque  
549 growth process seems to be independent of ethnicity (21).

550 A further limitation of this UK focused dataset is that socio-economic and other environmental  
551 factors differ between countries. This is another potential bias that needs to be further evaluated  
552 with datasets from other countries with different socio-economic characteristics.

553

554 Disease risk prediction models which include subjective non-laboratory risk factors, such as the  
555 self-reported health rating and usual walking pace, should be cautiously evaluated to minimize  
556 self-reported bias. These risk factors have been found to be good predictors of someone's  
557 overall CVD risk in another study using UK Biobank data (28).

558

## 559 **Conclusions**

560 We benchmarked multiple classifiers to predict an individual's 10-year risk of developing an  
561 atherosclerotic CVD, using a holistic set of risk factors and a specific definition of atherosclerotic  
562 CVDs. Our reduced Logistic Regression with L1 regularization classifier, a simple and  
563 interpretable model, is amongst our best prediction models, includes actionable lifestyle factors,  
564 has great predictive power and requires 13 unique features. Our experiments showed that a two  
565 feature-questionnaire is as accurate as the Framingham models and a 16 feature-questionnaire  
566 is as accurate as QRisk3 for 10-year atherosclerotic CVD risk prediction. Both prediction  
567 models, XGBoost and Logistic Regression, generalize well to non-white people, which might  
568 indicate that our models generalize well to other (western) countries. Framingham and QRisk3,  
569 which are well established and validated absolute risk prediction models, do not perform as well  
570 on predicting individuals' 10-year risk of developing an atherosclerotic CVD. With our Logistic  
571 Regression model, we created a promising new interpretable, actionable and accurate risk  
572 prediction tool that could assist individuals and public health in CVD risk reduction.

573

## 574 **Acknowledgments**

575

## 576 **Author Contributions**

577 **Conceptualization.** Ajay Kesar, Stephen Gilbert, Paul Wicks, Bernard Leon Stopak

578 **Data Curation.** Ajay Kesar, Adel Baluch, Omer Barber, Milan Jovanovic  
579 **Formal Analysis.** Ajay Kesar, Daniel Renz  
580 **Funding Acquisition.** Stephen Gilbert, Bernard Leon Stopak, Henry Hoffmann  
581 **Investigation.** Ajay Kesar  
582 **Methodology.** Ajay Kesar, Daniel Renz  
583 **Project Administration.** Ajay Kesar  
584 **Resources.** Ajay Kesar, Stephen Gilbert, Bernard Leon Stopak, Henry Hoffmann  
585 **Software.** Ajay Kesar, Daniel Renz  
586 **Supervision.** Stephen Gilbert, Henry Hoffmann  
587 **Validation.** Ajay Kesar, Daniel Renz  
588 **Visualization.** Ajay Kesar  
589 **Writing – Original Draft Preparation.** Ajay Kesar, Daniel Renz, Paul Wicks, Stephen Gilbert  
590 **Writing – Review & Editing.** Ajay Kesar, Henry Hoffmann, Daniel Renz, Bernard Leon Stopak,  
591 Paul Wicks, Stephen Gilbert

592

593

## 594 **References**

- 595 1. Cardiovascular diseases (CVDs) [Internet]. [cited 2021 Sep 28]. Available from:  
596 [https://www.who.int/news-room/fact-sheets/detail/cardiovascular-diseases-\(cvds\)](https://www.who.int/news-room/fact-sheets/detail/cardiovascular-diseases-(cvds))
- 597 2. Roth GA, Mensah GA, Johnson CO, Addolorato G, Ammirati E, Baddour LM, et al. Global  
598 Burden of Cardiovascular Diseases and Risk Factors, 1990–2019. *J Am Coll Cardiol*. 2020  
599 Dec 22;76(25):2982–3021.
- 600 3. Heidenreich PA, Trogdon JG, Khavjou OA, Butler J, Dracup K, Ezekowitz MD, et al.  
601 Forecasting the Future of Cardiovascular Disease in the United States. *Circulation*. 2011  
602 Mar 1;123(8):933–44.

- 603 4. Weintraub WS, Daniels SR, Burke LE, Franklin BA, Goff DC, Hayman LL, et al. Value of  
604 Primordial and Primary Prevention for Cardiovascular Disease. *Circulation*. 2011 Aug  
605 23;124(8):967–90.
- 606 5. Evsikova C, Raplee I, Lockhart J, Jaimes G, Evsikov A. The Transcriptomic Toolbox:  
607 Resources for Interpreting Large Gene Expression Data within a Precision Medicine  
608 Context for Metabolic Disease Atherosclerosis. *J Pers Med*. 2019 Apr 29;9:21.
- 609 6. Nichols GA, Bell TJ, Pedula KL, O’Keeffe-Rosetti M. Medical care costs among patients  
610 with established cardiovascular disease. *Am J Manag Care*. 2010 Mar 1;16(3):e86–93.
- 611 7. Piepoli MF, Hoes AW, Agewall S, Albus C, Brotons C, Catapano AL, et al. 2016 European  
612 Guidelines on cardiovascular disease prevention in clinical practice: The Sixth Joint Task  
613 Force of the European Society of Cardiology and Other Societies on Cardiovascular  
614 Disease Prevention in Clinical Practice (constituted by representatives of 10 societies and  
615 by invited experts) Developed with the special contribution of the European Association for  
616 Cardiovascular Prevention & Rehabilitation (EACPR). *Eur Heart J*. 2016 Aug  
617 1;37(29):2315–81.
- 618 8. 2013 ACC/AHA Guideline on the Assessment of Cardiovascular Risk. *J Am Coll Cardiol*.  
619 2014 Jul 1;63(25 0 0):2935–59.
- 620 9. Sedgwick JEC. Absolute, attributable, and relative risk in the management of coronary  
621 heart disease. *Heart*. 2001 May 1;85(5):491–2.
- 622 10. Jackson R. Guidelines on preventing cardiovascular disease in clinical practice: Absolute  
623 risk rules—but raises the question of population screening. *BMJ*. 2000 Mar  
624 11;320(7236):659–61.
- 625 11. Libby P, Bonow RO, Mann DL, Tomaselli GF, Zipes DP. Braunwald’s Heart Disease E-  
626 Book: A Textbook of Cardiovascular Medicine. Elsevier Health Sciences; 2018. 2527 p.
- 627 12. Eriksen CU, Rotar O, Toft U, Jørgensen T. What is the effectiveness of systematic  
628 population-level screening programmes for reducing the burden of cardiovascular  
629 diseases? [Internet]. Copenhagen: WHO Regional Office for Europe; 2021 [cited 2021 Oct  
630 12]. (WHO Health Evidence Network Synthesis Reports). Available from:  
631 <http://www.ncbi.nlm.nih.gov/books/NBK567843/>
- 632 13. Lim LS, Haq N, Mahmood S, Hoeksema L. Atherosclerotic Cardiovascular Disease  
633 Screening in Adults: American College of Preventive Medicine Position Statement on  
634 Preventive Practice. *Am J Prev Med*. 2011 Mar 1;40(3):381.e1-381.e10.
- 635 14. Espinoza J, Crown K, Kulkarni O. A Guide to Chatbots for COVID-19 Screening at  
636 Pediatric Health Care Facilities. *JMIR Public Health Surveill*. 2020 Apr 30;6(2):e18808.
- 637 15. Perez MV, Mahaffey KW, Hedlin H, Rumsfeld JS, Garcia A, Ferris T, et al. Large-Scale  
638 Assessment of a Smartwatch to Identify Atrial Fibrillation. *N Engl J Med*. 2019 Nov  
639 14;381(20):1909–17.

- 640 16. Lemmen C, Simic D, Stock S. A Vision of Future Healthcare: Potential Opportunities and  
641 Risks of Systems Medicine from a Citizen and Patient Perspective—Results of a  
642 Qualitative Study. *Int J Environ Res Public Health*. 2021 Sep 19;18(18):9879.
- 643 17. Peeters JM, Krijgsman JW, Brabers AE, Jong JDD, Friele RD. Use and Uptake of eHealth  
644 in General Practice: A Cross-Sectional Survey and Focus Group Study Among Health  
645 Care Users and General Practitioners. *JMIR Med Inform*. 2016 Apr 6;4(2):e4515.
- 646 18. Bui QT, Prempeh M, Wilensky RL. Atherosclerotic plaque development. *Int J Biochem Cell*  
647 *Biol*. 2009 Nov 1;41(11):2109–13.
- 648 19. Herrington W, Lacey B, Sherliker P, Armitage J, Lewington S. Epidemiology of  
649 Atherosclerosis and the Potential to Reduce the Global Burden of Atherothrombotic  
650 Disease. *Circ Res*. 2016 Feb 19;118(4):535–46.
- 651 20. Bentzon JF, Otsuka F, Virmani R, Falk E. Mechanisms of Plaque Formation and Rupture.  
652 *Circ Res*. 2014 Jun 6;114(12):1852–66.
- 653 21. Insull W. The Pathology of Atherosclerosis: Plaque Development and Plaque Responses  
654 to Medical Treatment. *Am J Med*. 2009 Jan 1;122(1, Supplement):S3–14.
- 655 22. Picard M, Scott-Boyer M-P, Bodein A, Périn O, Droit A. Integration strategies of multi-  
656 omics data for machine learning analysis. *Comput Struct Biotechnol J*. 2021 Jan  
657 1;19:3735–46.
- 658 23. Collins FS, Varmus H. A New Initiative on Precision Medicine [Internet].  
659 <https://doi.org/10.1056/NEJMp1500523>. Massachusetts Medical Society; 2015 [cited 2021  
660 Sep 29]. Available from: <https://www.nejm.org/doi/10.1056/NEJMp1500523>
- 661 24. Leon-Mimila P, Wang J, Huertas-Vazquez A. Relevance of Multi-Omics Studies in  
662 Cardiovascular Diseases. *Front Cardiovasc Med*. 2019;6:91.
- 663 25. Fruchart J-C, Nierman MC, Stroes ESG, Kastelein JJP, Duriez P. New Risk Factors for  
664 Atherosclerosis and Patient Risk Assessment. *Circulation*. 2004 Jun  
665 15;109(23\_suppl\_1):III–15.
- 666 26. D’Agostino RB, Vasan RS, Pencina MJ, Wolf PA, Cobain M, Massaro JM, et al. General  
667 cardiovascular risk profile for use in primary care: the Framingham Heart Study.  
668 *Circulation*. 2008 Feb 12;117(6):743–53.
- 669 27. Hippisley-Cox J, Coupland C, Brindle P. Development and validation of QRISK3 risk  
670 prediction algorithms to estimate future risk of cardiovascular disease: prospective cohort  
671 study. *BMJ*. 2017 May 23;357:j2099.
- 672 28. Alaa AM, Bolton T, Angelantonio ED, Rudd JHF, Schaar M van der. Cardiovascular  
673 disease risk prediction using automated machine learning: A prospective study of 423,604  
674 UK Biobank participants. *PLOS ONE*. 2019 May 15;14(5):e0213653.
- 675 29. Conroy RM, Pyörälä K, Fitzgerald AP, Sans S, Menotti A, De Backer G, et al. Estimation of  
676 ten-year risk of fatal cardiovascular disease in Europe: the SCORE project. *Eur Heart J*.  
677 2003 Jun 1;24(11):987–1003.

- 678 30. SCORE2 working group and ESC Cardiovascular risk collaboration. SCORE2 risk  
679 prediction algorithms: new models to estimate 10-year risk of cardiovascular disease in  
680 Europe. *Eur Heart J*. 2021 Jul 1;42(25):2439–54.
- 681 31. Dolezalova N, Reed AB, Despotovic A, Obika BD, Morelli D, Aral M, et al. Development of  
682 an accessible 10-year Digital CARDioVAscular (DiCAVA) risk assessment: a UK Biobank  
683 study. *Eur Heart J - Digit Health*. 2021 Sep 1;2(3):528–38.
- 684 32. Kopitar L, Kocbek P, Cilar L, Sheikh A, Stiglic G. Early detection of type 2 diabetes mellitus  
685 using machine learning-based prediction models. *Sci Rep*. 2020 Jul 20;10(1):11981.
- 686 33. Ngiam KY, Khor IW. Big data and machine learning algorithms for health-care delivery.  
687 *Lancet Oncol*. 2019 May 1;20(5):e262–73.
- 688 34. Doupe P, Faghmous J, Basu S. Machine Learning for Health Services Researchers. *Value*  
689 *Health*. 2019 Jul 1;22(7):808–15.
- 690 35. Adadi A, Berrada M. Explainable AI for Healthcare: From Black Box to Interpretable  
691 Models. In: Bhateja V, Satapathy SC, Satori H, editors. *Embedded Systems and Artificial*  
692 *Intelligence*. Singapore: Springer Singapore; 2020. p. 327–37.
- 693 36. He J, Baxter SL, Xu J, Xu J, Zhou X, Zhang K. The practical implementation of artificial  
694 intelligence technologies in medicine. *Nat Med*. 2019 Jan;25(1):30–6.
- 695 37. Pedregosa F, Varoquaux G, Gramfort A, Michel V, Thirion B, Grisel O, et al. Scikit-learn:  
696 Machine Learning in Python. *J Mach Learn Res*. 2011;12(85):2825–30.
- 697 38. Chen T, Guestrin C. XGBoost: A Scalable Tree Boosting System. *Proc 22nd ACM*  
698 *SIGKDD Int Conf Knowl Discov Data Min*. 2016 Aug 13;785–94.
- 699 39. Sudlow C, Gallacher J, Allen N, Beral V, Burton P, Danesh J, et al. UK Biobank: An Open  
700 Access Resource for Identifying the Causes of a Wide Range of Complex Diseases of  
701 Middle and Old Age. *PLOS Med*. 2015 Mar 31;12(3):e1001779.
- 702 40. About us [Internet]. [cited 2021 Nov 9]. Available from: [https://www.ukbiobank.ac.uk/learn-](https://www.ukbiobank.ac.uk/learn-more-about-uk-biobank/about-us)  
703 [more-about-uk-biobank/about-us](https://www.ukbiobank.ac.uk/learn-more-about-uk-biobank/about-us)
- 704 41. Collins R. UK Biobank Protocol. :112.
- 705 42. Ethics [Internet]. [cited 2021 Nov 9]. Available from: [https://www.ukbiobank.ac.uk/learn-](https://www.ukbiobank.ac.uk/learn-more-about-uk-biobank/about-us/ethics)  
706 [more-about-uk-biobank/about-us/ethics](https://www.ukbiobank.ac.uk/learn-more-about-uk-biobank/about-us/ethics)
- 707 43. Cardiovascular Disease (10-year risk) | Framingham Heart Study [Internet]. [cited 2021  
708 Nov 10]. Available from: [https://framinghamheartstudy.org/fhs-risk-](https://framinghamheartstudy.org/fhs-risk-functions/cardiovascular-disease-10-year-risk/)  
709 [functions/cardiovascular-disease-10-year-risk/](https://framinghamheartstudy.org/fhs-risk-functions/cardiovascular-disease-10-year-risk/)
- 710 44. QRISK3 [Internet]. [cited 2021 Nov 10]. Available from: <https://qrisk.org/three/index.php>
- 711 45. Friedman JH. Greedy Function Approximation: A Gradient Boosting Machine. *Ann Stat*.  
712 2001;29(5):1189–232.

- 713 46. XGBoost Documentation — xgboost 1.6.0-dev documentation [Internet]. [cited 2021 Nov  
714 8]. Available from: <https://xgboost.readthedocs.io/en/latest/>
- 715 47. Hearst MA, Dumais ST, Osuna E, Platt J, Scholkopf B. Support vector machines. *IEEE*  
716 *Intell Syst Their Appl.* 1998 Jul;13(4):18–28.
- 717 48. Zhang T. Solving large scale linear prediction problems using stochastic gradient descent  
718 algorithms. In: *Proceedings of the twenty-first international conference on Machine learning*  
719 [Internet]. New York, NY, USA: Association for Computing Machinery; 2004 [cited 2021  
720 Nov 12]. p. 116. (ICML '04). Available from: <https://doi.org/10.1145/1015330.1015332>
- 721 49. Freund Y, Schapire RE. A Decision-Theoretic Generalization of On-Line Learning and an  
722 Application to Boosting. *J Comput Syst Sci.* 1997 Aug 1;55(1):119–39.
- 723 50. Hastie T, Rosset S, Zhu J, Zou H. Multi-class AdaBoost. *Stat Interface.* 2009;2(3):349–60.
- 724 51. Omohundro SM. Five balltree construction algorithms. *International Computer Science*  
725 *Institute Berkeley*; 1989.
- 726 52. Srivastava S, Gupta MR, Frigyik BA. Bayesian quadratic discriminant analysis. *J Mach*  
727 *Learn Res.* 2007;8(6).
- 728 53. Zhang H. The optimality of naive Bayes. *AA.* 2004;1(2):3.
- 729 54. Tibshirani R. Regression Shrinkage and Selection Via the Lasso. *J R Stat Soc Ser B*  
730 *Methodol.* 1996;58(1):267–88.
- 731 55. Correll CU, Solmi M, Veronese N, Bortolato B, Rosson S, Santonastaso P, et al.  
732 Prevalence, incidence and mortality from cardiovascular disease in patients with pooled  
733 and specific severe mental illness: a large-scale meta-analysis of 3,211,768 patients and  
734 113,383,368 controls. *World Psychiatry.* 2017;16(2):163–80.
- 735 56. Cunningham R, Poppe K, Peterson D, Every-Palmer S, Soosay I, Jackson R. Prediction of  
736 cardiovascular disease risk among people with severe mental illness: A cohort study.  
737 *PLOS ONE.* 2019 Sep 18;14(9):e0221521.
- 738 57. Hasin Y, Seldin M, Lusic A. Multi-omics approaches to disease. *Genome Biol.* 2017 May  
739 5;18(1):83.
- 740 58. Gao W, Yu C. Wearable and Implantable Devices for Healthcare. *Adv Healthc Mater.* 2021  
741 Sep 1;10(17):2101548.
- 742 59. Jiang X, Ming W-K, You JH. The Cost-Effectiveness of Digital Health Interventions on the  
743 Management of Cardiovascular Diseases: Systematic Review. *J Med Internet Res.* 2019  
744 Jun 17;21(6):e13166.
- 745 60. Trust for America's Health. Prevention for a healthier America: Investments in disease  
746 prevention yield significant savings, stronger communities. 2008;



747 61. Heron N, Kee F, Donnelly M, Cardwell C, Tully MA, Cupples ME. Behaviour change  
748 techniques in home-based cardiac rehabilitation: a systematic review. Br J Gen Pract.  
749 2016 Oct;66(651):e747–57.

750

## 751 **Supporting Information**

752 **S1 Table. List of all risk factors used in our analysis. (XLSX)**

753 The listed risk factors were summarized into 203 risk factors for the respective UK Biobank  
754 participant.

755 **S2 Table. List of all outcomes used in our analysis. (XLSX)**

756 The following outcomes were all consolidated into one final binary outcome column indicating if  
757 the respective UK Biobank participant did or did not develop one the relevant atherosclerotic  
758 CVDs during their individual 10-year follow-up period starting from their individual initial  
759 assessment attendance date.

760 **S3 Table. Specifications of the python (v3.9.6) libraries and their versions used in this  
761 study. (PDF)**

762 **S4 Table. List of utilized open-source methods, best parameters and references. (PDF)**

763 **S5 Table. Full list of relative informative values for each risk factor for best performing**

764 **Logistic Regression model. (XLSX)**

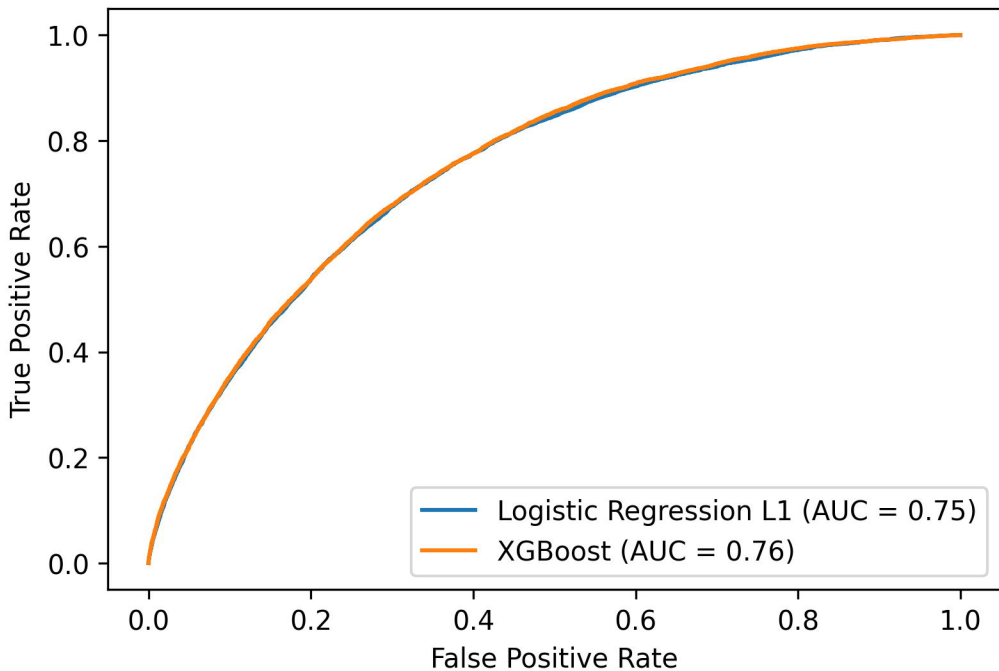

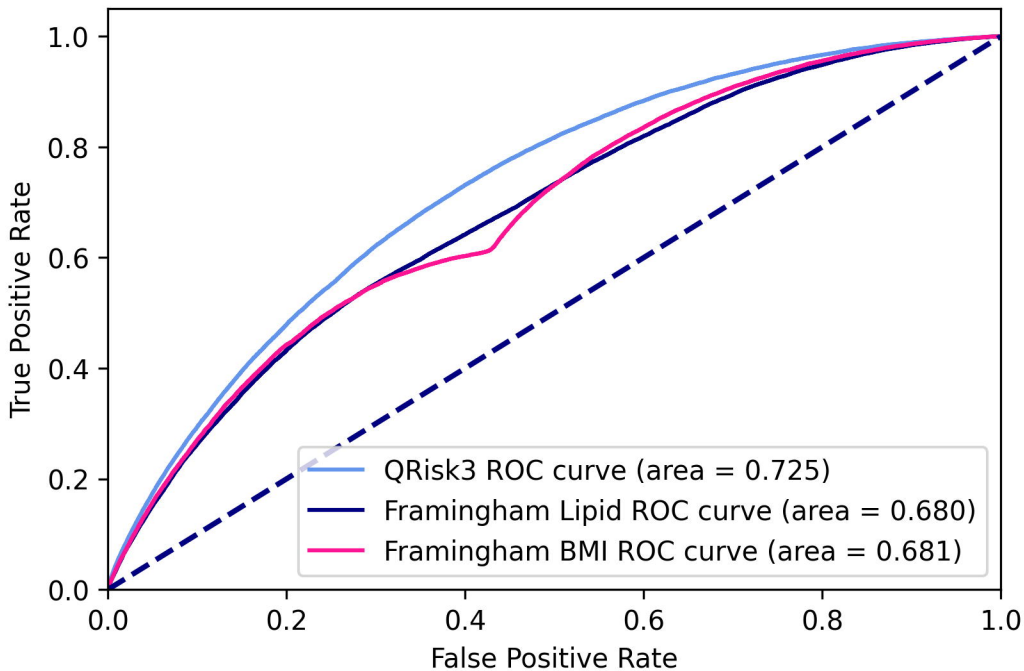

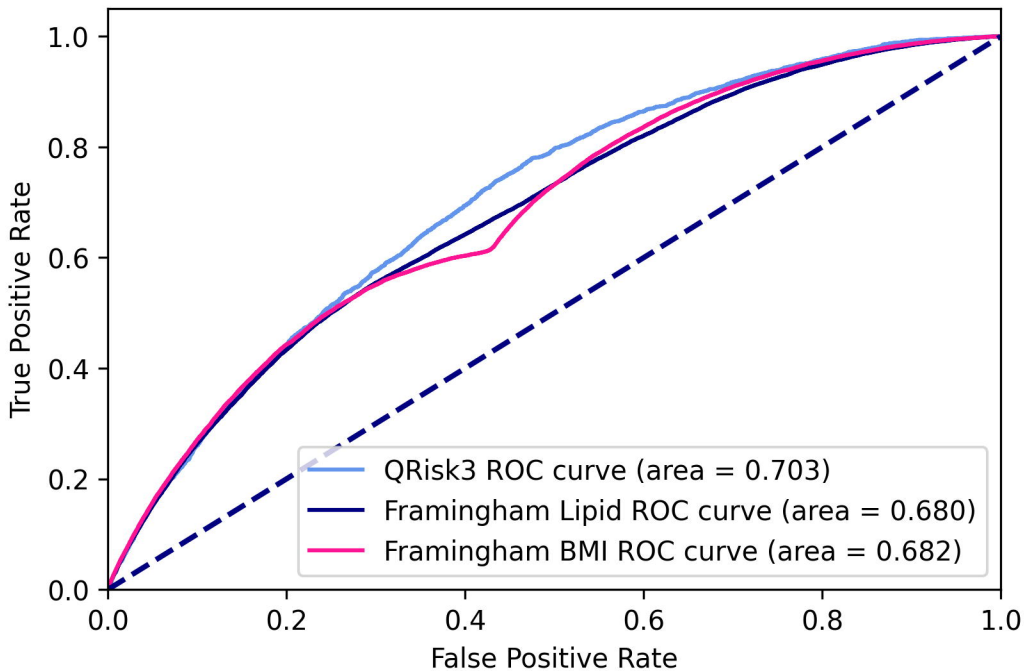

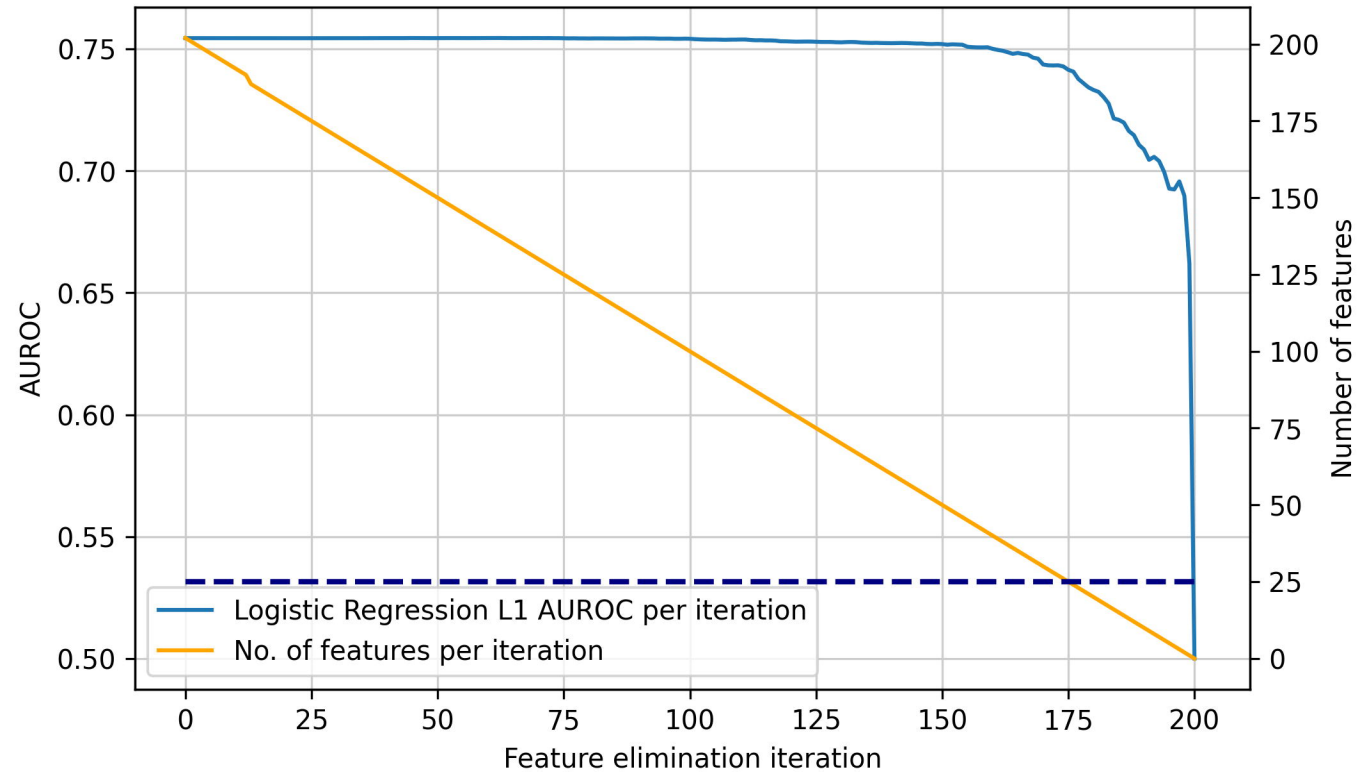

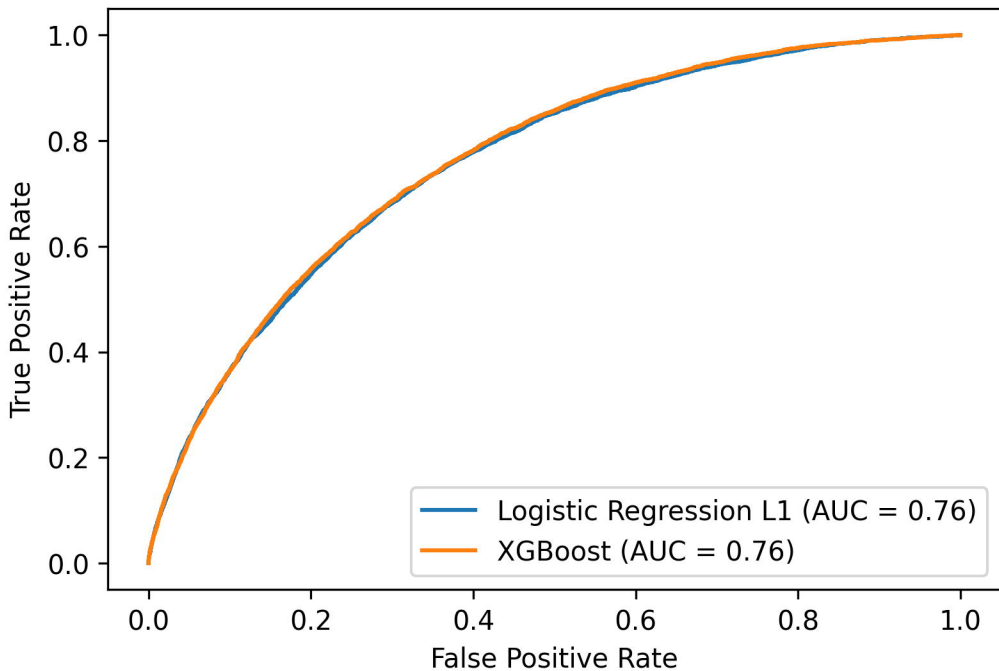

Source: https://www.medrxiv.org/content/10.1101/2021.11.24.21266742v1.full.pdf
